# Supplementary material
Source: publisher figshare collection journal article supplement (https://wiley.figshare.com/articles/dataset/_/3559908)
Supplement: Supplementary file 1 [file 1 › appendix-A.htm]

Ecological Archives E095-181-A1


*Ecological Archives* E095-181-A1

James A. Lutz, Andrew J. Larson, Tucker J. Furniss, Daniel C. Donato, James A. Freund, Mark E. Swanson, Kenneth J. Bible, Jiquan Chen, Jerry F. Franklin. 2014. Spatially nonrandom tree mortality and ingrowth maintain equilibrium pattern in an old-growth *Pseudotsuga–Tsuga* forest. *Ecology* 95:2047–2054. http://dx.doi.org/10.1890/14-0157.1

Appendix A. Spatial patterns and simulations for all tree species from 1999 to 2012.

> View / download PDF.


---

[Back to E095-181]
